# Supplementary material for: Multi-isotopic and morphometric evidence for the migration of farmers leading up to the Inka conquest of the southern Andes
Source: PubMed Central journal article supplement (PMC7712914; doi:10.1038/s41598-020-78013-x), 2020-12-03
Supplement: 41598_2020_78013_MOESM1_ESM.pdf [file 41598_2020_78013_MOESM1_ESM.pdf]

## Supplementary Information

### Multi-isotopic and morphometric evidence for the migration of farmers leading up to the Inka conquest of the southern Andes

Ramiro Barberena<sup>1,2</sup>, Lumila Menéndez<sup>3,4</sup>, Petrus J. le Roux<sup>5</sup>, Erik J. Marsh<sup>1,2</sup>, Augusto Tessone<sup>6</sup>, Paula Novellino<sup>7</sup>, Gustavo Lucero<sup>8</sup>, Julie Luyt<sup>9</sup>, Judith Sealy<sup>9</sup>, Marcelo Cardillo<sup>10</sup>, Alejandra Gasco<sup>1,2</sup>, Carina Llano<sup>1,11</sup>, Cecilia Frigolé<sup>1,2</sup>, Daniela Guevara<sup>7</sup>, Gabriela Da Peña<sup>7</sup>, Diego Winocur<sup>12</sup>, Anahí Benítez<sup>12</sup>, Luis Cornejo<sup>13</sup>, Fernanda Falabella<sup>14</sup>, César Méndez<sup>15</sup>, Amalia Nuevo-Delaunay<sup>15</sup>, Lorena Sanhueza<sup>14</sup>, Francisca Santana Sagredo<sup>16</sup>, Andrés Troncoso<sup>14</sup>, Sol Zárate<sup>1</sup>, Víctor A. Durán<sup>1,2</sup> & Valeria Cortegoso<sup>1,2</sup>

\* Correspondence to: [rbarberena@mendoza-conicet.gob.ar](mailto:rbarberena@mendoza-conicet.gob.ar); [menendez@uni-bonn.de](mailto:menendez@uni-bonn.de)

### Supplementary Text

#### Methods

**Strontium isotopes: lab procedures and statistical analysis.** The separation chemistry was performed in the clean-chemistry laboratory of the MC-ICP-MS facility in the Department of Geological Sciences, University of Cape Town (UCT)<sup>1</sup>, using ultra-pure 2-bottle-distilled HNO<sub>3</sub>. Powdered samples were weighed into 7 ml Savillex Teflon beakers, 2-3 ml of 65% HNO<sub>3</sub> added and the closed beakers placed at 140°C for an hour. Following complete sample dissolution, the beakers were opened, and the samples dried. The samples were taken up in 1.5 ml of 2M HNO<sub>3</sub> in preparation for elemental separation chemistry. The Sr fraction was isolated after methods detailed in<sup>2</sup> using Triskem International Sr.Spec. resin, dried down and re-dissolved in 0.2% HNO<sub>3</sub>. <sup>87</sup>Sr/<sup>86</sup>Sr isotope analyses were performed using a Nu Instruments NuPlasma HR in the MC-ICP-MS facility housed in the Department of Geological Sciences, on 200 ppb Sr solutions. <sup>87</sup>Sr/<sup>86</sup>Sr data presented are referenced to bracketing analyses of the international strontium isotope standard SRM987, using an <sup>87</sup>Sr/<sup>86</sup>Sr value for this standard of 0.710255. Isobaric interference of <sup>87</sup>Rb on <sup>87</sup>Sr was corrected using the measured signal for <sup>85</sup>Rb and the natural <sup>85</sup>Rb/<sup>87</sup>Rb ratio, while the effect of instrumental mass fractionation was corrected using the exponential law and an <sup>86</sup>Sr/<sup>88</sup>Sr value of 0.1194. Repeat analyses of an in-house carbonate reference material NM95 as unknown during processing of samples for this study yielded an <sup>87</sup>Sr/<sup>86</sup>Sr result (0.708912 ± 0.000037; n = 17), in agreement with long-term data for this material (0.708911 ± 0.000040 2σ; n = 414; over >8 years). Total procedural strontium blanks were typically better than ~250 pg and therefore negligible.

For statistical analysis, we tested for multimodality in the entire sample using a Hartigan's Dip test for unimodality (with values less than .05 indicating significant bimodality), and then the boot.com and normalmixEM function of the mixtools package in R<sup>3</sup> to search and fit different numbers of mixture components (up to five), using 1000 bootstrap realizations of the likelihood ratio statistic for the iterative

procedure. Comparison of  $^{87}\text{Sr}/^{86}\text{Sr}$  values between sites was done with Wilcoxon–Mann–Whitney two-sample rank test for paired comparisons with Bonferroni correction. Additionally, we computed the effect size using  $r$  value (which is the  $Z$  value from the test divided by the total number of observations). Unlike  $P$ -values, they are not affected by sample size.  $R$  values  $\geq 0.50$  are considered large<sup>4</sup>.

***Paleodietary studies in apatite and collagen.*** A hand-held rotary drill fitted with a 1.2 mm diameter diamond-tipped dental drill bit was used to collect approximately 10 mg of enamel powder. The tooth was drilled from the occlusal surface to the cervix to collect enamel representative of the entire period of crown formation in order to average out seasonal variations. The enamel was treated following established method for tooth enamel pre-treatment<sup>5</sup>. Samples were treated with 1.75% sodium hydroxide for 45 minutes, rinsed three times with distilled water, and then reacted with 0.1M acetic acid for 15 minutes. Finally, they were rinsed three times with distilled water, freeze-dried<sup>6</sup>. The bone powder was treated with 1.75% sodium hypochlorite for 3 hours, rinsed three times with distilled water, then reacted with 0.1M acetic acid for 15 minutes. Samples were rinsed again and finally freeze dried. For bone collagen analyses, each sample was mechanically cleaned and weighed to enable determination of the collagen yield. The samples were then soaked overnight at room temperature in a de-fatting solution of chloroform, methanol and water (2.0:1.0:0.8 v:v). Most lipids were removed by this solution and floated to the top of the liquid. The de-fatting process was repeated if large quantities of lipids were observed. All samples were then rinsed with distilled water. Samples were then soaked in dilute HCl (0.2M) at room temperature to remove the apatite from the bone. The acid was changed every day for between five to ten days, depending on the size of the sample and the density of the bone. This resulted in a translucent, flexible pseudomorph of (mostly) collagen of the same shape and size as the original bone fragment. Each pseudomorph was soaked in 0.1M NaOH overnight to remove base-soluble contaminants such as humic acids and any remaining lipids<sup>7</sup>. Next, the samples were soaked in distilled water, changed daily until its pH remained neutral. The sample was then freeze-dried and then allowed to equilibrate with the atmosphere (overnight) before being weighed to obtain the mass of collagen extracted. This is expressed as a percentage of the initial weight of the bone sample to give collagen yield. For each sample, approximately 0.5 mg of extracted collagen was weighed into a tin cup. The samples were combusted in a Flash EA 2000 series elemental analyzer (Thermo Finnigan, Milan, Italy). The gases were passed through to a Delta Plus V IRMS (Thermo electron, Bremen, Germany), via a Conflo IV gas control unit (Thermo Finnigan, Bremen, Germany). Standards used were in-house standards Chocolate ( $\delta^{13}\text{C} = -17.75\text{‰}$ ;  $\delta^{15}\text{N} = 4.31\text{‰}$ ); New MG ( $\delta^{13}\text{C} = -20.94\text{‰}$ ;  $\delta^{15}\text{N} = 4.70\text{‰}$ ); Sucrose ( $\delta^{13}\text{C} = -10.6\text{‰}$ ); Valine ( $\delta^{13}\text{C} = -26.80\text{‰}$ ;  $\delta^{15}\text{N} = 12.14\text{‰}$ ). Each standard had been calibrated against international standard materials NBS 21, IAEA N1 and N2 and standards exchanged with other laboratories. The reproducibility of repeated measurements of standard materials was  $\leq 0.2\text{‰}$ .

***Calibration and Modeling of Radiocarbon Dates.*** For the histogram of locals and migrants (Fig. 3B), totals for each archaeological site are shown below the dates from the same site. For Túmulo II, all 11 individuals are local, two of which are dated. The histogram bar is widened to include the temporal range suggested by the two dates. For Potrero Las Colonias, all seven individuals are migrants and there are three dates available.

There seem to be two phases of cemetery use, so four of these individuals are arbitrarily included in the histogram bar aligned with the earlier date and three with the later date. The later bar includes locals and migrants from Túmulo III. Finally, the date from Monte de Algarrobos has a bimodal distribution and its greater probability lies after European contact (AD 1610–1680, 56%) but as part of the model its median date is *AD 1530 (1500–1670, 95% probability, A=70)*. Below we present the OxCal<sup>8</sup> code used to generate the KDE plots in Fig. 3 and estimate the first and last date of the migrant phase.

```

Plot()
{
  Curve("SHCal20","SHCal20.14c");
  Phase()
  {
    Sequence()
    {
      Boundary("Start Locals");
      KDE_Plot("Locals")
      {
        color="green";
        R_Date("AA-66568, Túmulo I", 977, 35);
        R_Date("AA-66565, Túmulo II", 1178, 41);
        R_Date("AA-66561, Túmulo II", 1269, 35);
        Combine("Barrio Ramos")
        {
          R_Date("AA-98708, Barrio Ramos",583,43);
          R_Date("I-16636, Barrio Ramos",470,80);
          C_Date("UCTL-308, Barrio Ramos",AD(1400),60);
        };
      };
      Boundary("End Locals");
    };
    Sequence()
    {
      Boundary("Start Migrants");
      KDE_Plot("Migrants")
      {
        color="red";
        R_Date("AA-66566, Túmulo III", 671, 40);
        R_Date("D-AMS-0033193, Uspallata Usina Sur", 772, 25);
        R_Date("D-AMS-031415, Potrero Las Colonias", 634, 28);
        R_Date("AA-66564, Potrero Las Colonias", 568, 38);
        R_Date("D-AMS-033194, Potrero Las Colonias", 682, 25);
        First("First migrants");
        Last("Last migrants");
      };
      R_Date("D-AMS-030192, Monte de Algarrobo",298,28);
      Boundary("End Migrants");
    };
  };
};

```

## Supplementary figures

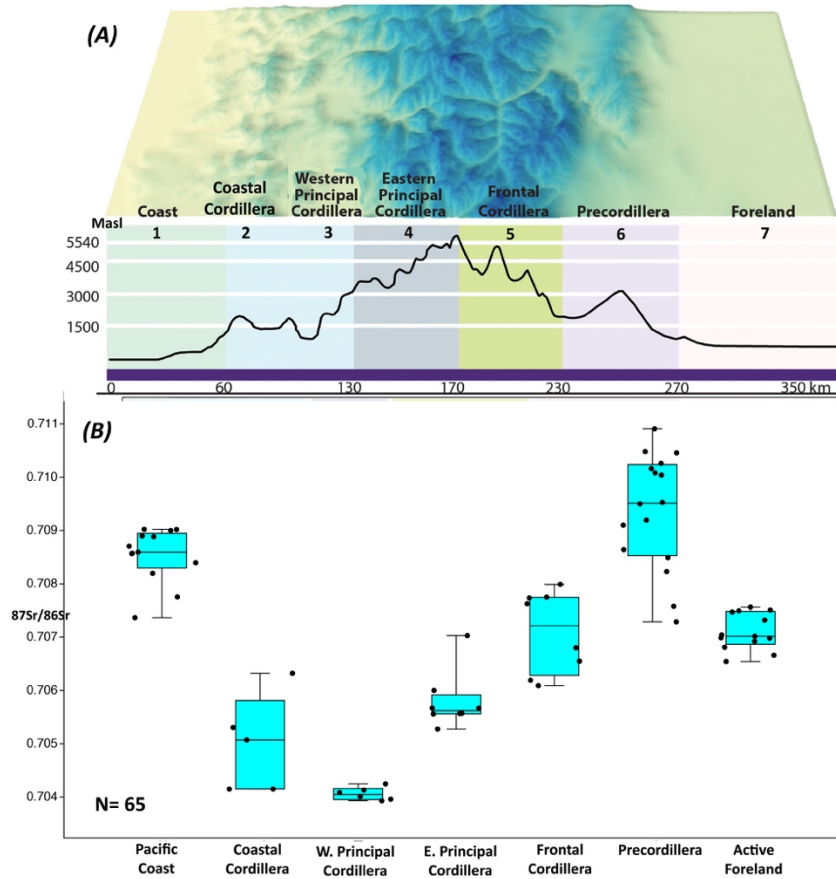

**Figure S1.** (a) West-east altitudinal profile of the southern Andes; (b)  $^{87}\text{Sr}/^{86}\text{Sr}$  values for rodent samples. Map made by with Quantum GIS, Ver 3.2.3 (<https://www.qgis.org>), Qgis2threejs (<https://github.com/minorua/Qgis2threejs>) and edited with Inkscape 0.92 (<https://inkscape.org>).

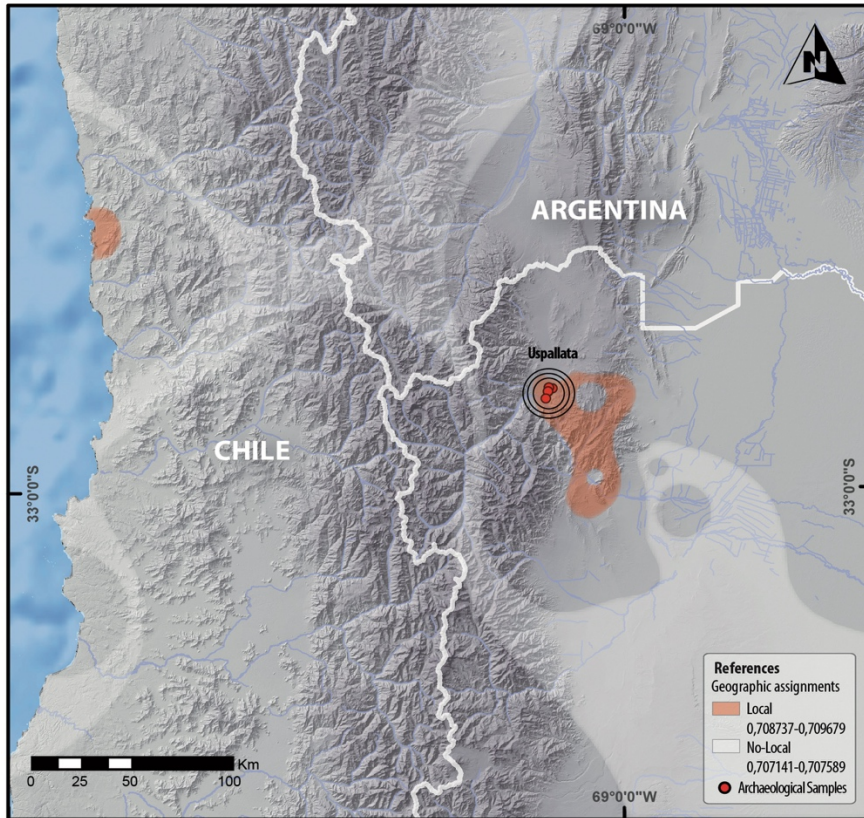

**Figure S2.** Areas of probable geographic residence for local and non-local individuals from the Uspallata Valley.



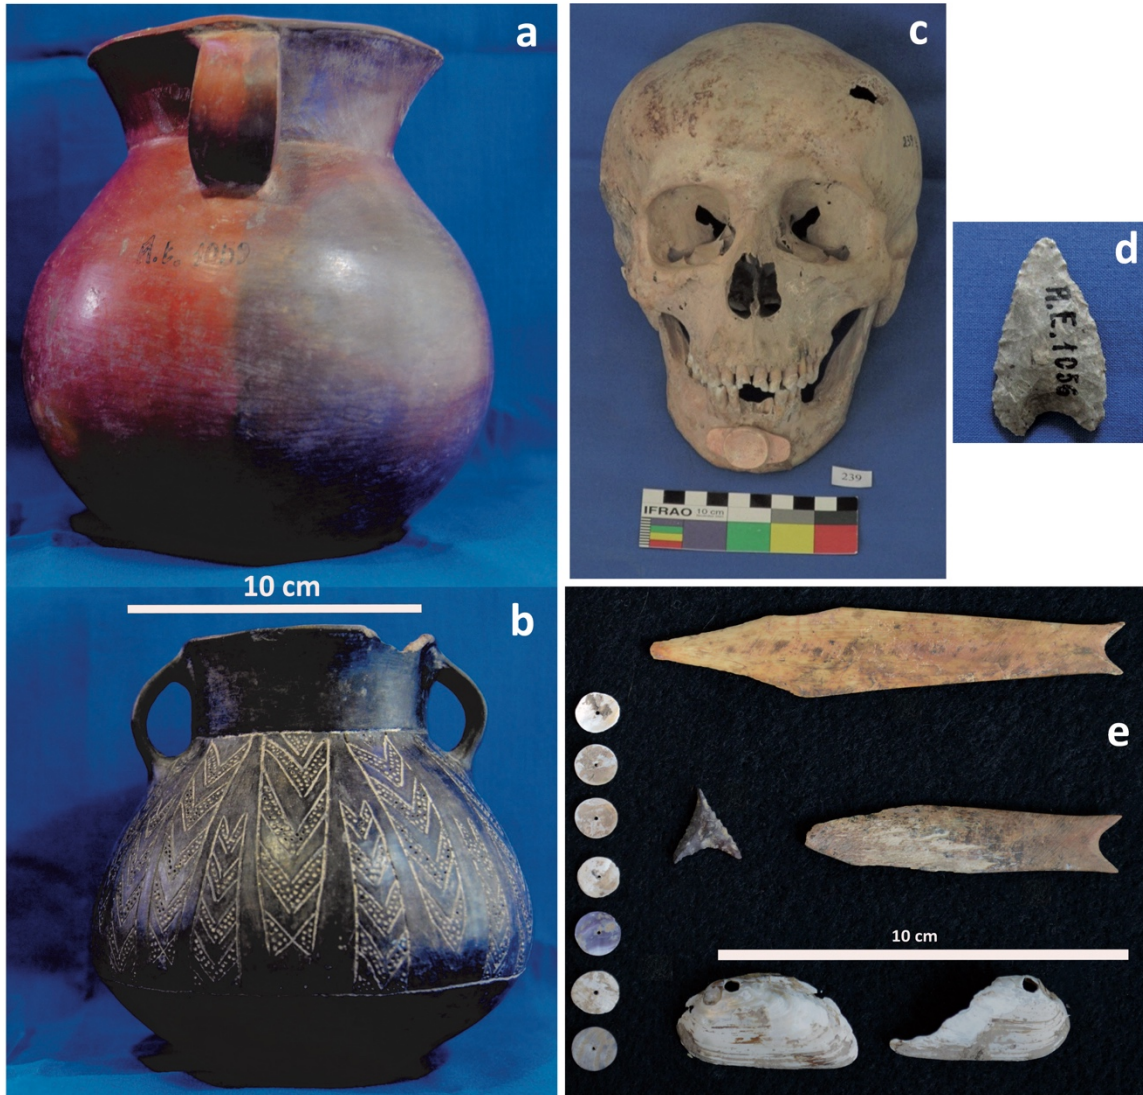

**Figure S3.** Grave goods from sites in the Uspallata Valley: **(a, b)** Ceramic vessels from Túmulo II, burial 245; **(c)** Cranium with lithic lip plug associated with individual 239 from Túmulo II; **(d)** Lithic projectile point associated with individual 241 from Túmulo II; **(e)** Diverse grave goods from Barrio Ramos I.

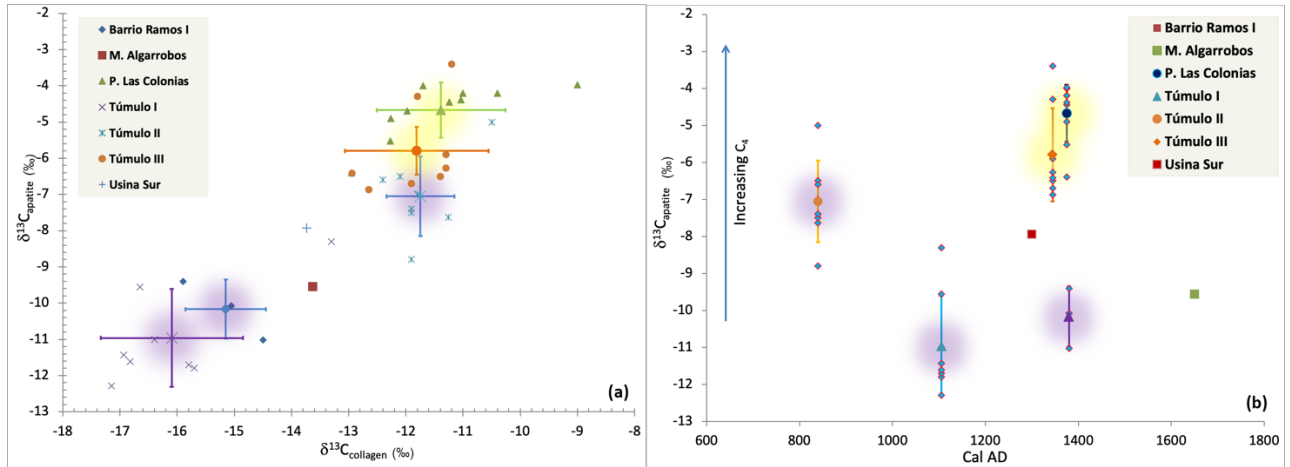

**Figure S4.** Paleodietary results from the Uspallata Valley: **(a)** Inter-site comparison of  $\delta^{13}\text{C}_{\text{apatite}}$  and  $\delta^{13}\text{C}_{\text{collagen}}$ ; **(b)** Temporal trends in  $\delta^{13}\text{C}_{\text{apatite}}$  values (highlighted in purple: sites with locals; highlighted in yellow: sites with non-locals).

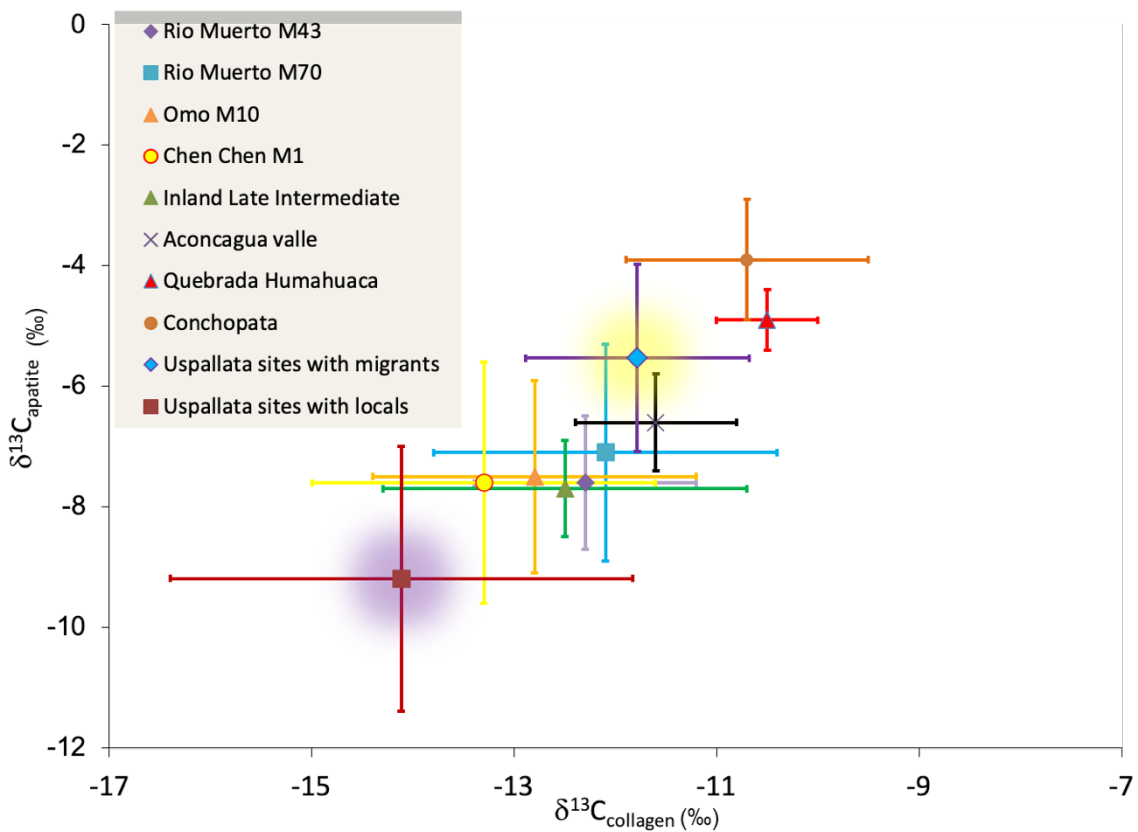

**Figure S5.**  $\delta^{13}\text{C}_{\text{apat.}}$  and  $\delta^{13}\text{C}_{\text{coll.}}$  values from key Andean sites from Peru to Central Argentina and Chile including Conchopata, Quebrada de Humahuaca, Aconcagua, Late intermediate in Chilean Central Valley, Chen Chen, Omo, Río Muerto<sup>9-13</sup> (highlighted in purple: sites with locals from Uspallata; highlighted in yellow: sites with non-locals from Uspallata).

## Supplementary tables

**Table S1.**  $^{87}\text{Sr}/^{86}\text{Sr}$  results for rodent samples from the southern Andes (Argentina and Chile).

| N  | Site                | Geological unit         | Latitude  | Longitude  | Taxon                   | $^{87}\text{Sr}/^{86}\text{Sr}$ | Source        |
|----|---------------------|-------------------------|-----------|------------|-------------------------|---------------------------------|---------------|
| 1  | Los Vilos           | Pacific Coast           | 262631.40 | 6466619.52 | Rodentia                | 0.708395                        | This paper    |
| 2  | Los Vilos           | Pacific Coast           | 262631.40 | 6466619.52 | Rodentia                | 0.708706                        | This paper    |
| 3  | Los Vilos           | Pacific Coast           | 262631.40 | 6466619.52 | Rodentia                | 0.709022                        | This paper    |
| 4  | Los Vilos           | Pacific Coast           | 262631.40 | 6466619.52 | Rodentia                | 0.708593                        | This paper    |
| 5  | Los Vilos           | Pacific Coast           | 262631.40 | 6466619.52 | Rodentia                | 0.708885                        | This paper    |
| 6  | Los Vilos           | Pacific Coast           | 262631.40 | 6466619.52 | Rodentia                | 0.708999                        | This paper    |
| 7  | Los Vilos           | Pacific Coast           | 262631.40 | 6466619.52 | Rodentia                | 0.708898                        | This paper    |
| 8  | Los Vilos           | Pacific Coast           | 262631.40 | 6466619.52 | Rodentia                | 0.709019                        | This paper    |
| 9  | LEP-C               | Pacific Coast           | 257578    | 6289821    | <i>Myocastor coipus</i> | 0.708572                        | This paper    |
| 10 | LEP-C               | Pacific Coast           | 257578    | 6289821    | <i>Octodon</i> sp.      | 0.708197                        | This paper    |
| 11 | LEP-C               | Pacific Coast           | 257578    | 6289821    | <i>Octodon</i> sp.      | 0.708566                        | This paper    |
| 12 | Arévalo 2           | Pacific Coast           | 259168    | 6282310    | <i>Octodon</i> sp.      | 0.707365                        | This paper    |
| 13 | Arévalo 2           | Pacific Coast           | 259168    | 6282310    | <i>Octodon</i> sp.      | 0.707754                        | This paper    |
| 14 | RML-015             | Coastal Cordillera      | 324598    | 6317284    | <i>Octodon</i> sp.      | 0.704151                        | This paper    |
| 15 | E-101-3             | Coastal Cordillera      | 317900    | 6270000    | Rodentia                | 0.706320                        | This paper    |
| 16 | RML-008             | Coastal Cordillera      | 323314    | 6317819    | <i>Octodon</i> sp.      | 0.704150                        | This paper    |
| 17 | Cerro Chena         | Coastal Cordillera      | 337944    | 6279115    | <i>Myocastor coipus</i> | 0.705305                        | This paper    |
| 18 | E-101-1             | Coastal Cordillera      | 318250    | 6272450    | <i>Myocastor coipus</i> | 0.705072                        | This paper    |
| 19 | Combarbalá          | W. Principal Cordillera | 309757.99 | 6547675.41 | Rodentia                | 0.704083                        | This paper    |
| 20 | Combarbalá          | W. Principal Cordillera | 309757.99 | 6547675.41 | Rodentia                | 0.704131                        | This paper    |
| 21 | APG                 | W. Principal Cordillera | 325662.61 | 6508430.22 | Rodentia                | 0.704249                        | This paper    |
| 22 | Los Azules 1        | W. Principal Cordillera | 368949.00 | 6279626.00 | Rodentia                | 0.70393                         | <sup>14</sup> |
| 23 | Manzano 1           | W. Principal Cordillera | 366078.00 | 6285315.00 | Rodentia                | 0.70396                         | <sup>14</sup> |
| 24 | Los Queltehues      | W. Principal Cordillera | 387529.00 | 6247678.00 | Rodentia                | 0.70401                         | <sup>14</sup> |
| 25 | Las Cuevas          | E. Principal Cordillera | 403034.84 | 6368927.96 | Rodentia                | 0.705557                        | This paper    |
| 26 | Las Cuevas          | E. Principal Cordillera | 403034.84 | 6368927.96 | Rodentia                | 0.705566                        | This paper    |
| 27 | Las Cuevas          | E. Principal Cordillera | 403034.84 | 6368927.96 | Rodentia                | 0.705276                        | This paper    |
| 28 | Laguna del Diamante | E. Principal Cordillera | 435018.16 | 6215748.80 | Rodentia                | 0.707028                        | This paper    |
| 29 | Laguna del Diamante | E. Principal Cordillera | 437689.04 | 6215548.34 | Rodentia                | 0.706000                        | This paper    |
| 30 | Las Cuevas 1        | E. Principal Cordillera | 403032.42 | 6368925.45 | <i>Eligmodontia</i> sp. | 0.70567                         | <sup>15</sup> |
| 31 | Las Cuevas 2        | E. Principal Cordillera | 403032.42 | 6368925.45 | <i>Eligmodontia</i> sp. | 0.70567                         | <sup>15</sup> |



|    |                          |                         |           |            |                      |          |            |
|----|--------------------------|-------------------------|-----------|------------|----------------------|----------|------------|
| 32 | Aconcagua 1              | E. Principal Cordillera | 409520.35 | 6381003.54 | Rodentia             | 0.70557  | 15         |
| 33 | Gendarmería. L. Diamante | Frontal Cordillera      | 434448.00 | 6216494.00 | Rodentia             | 0.70655  | 14         |
| 34 | Quebrada de La Manga     | Frontal Cordillera      | 470445.23 | 6354813.14 | Rodentia             | 0.707626 | This paper |
| 35 | Quebrada de La Manga     | Frontal Cordillera      | 470445.23 | 6354813.14 | Rodentia             | 0.707750 | This paper |
| 36 | Quebrada de La Manga     | Frontal Cordillera      | 470425.60 | 6354858.31 | <i>Ctenomys</i> sp.  | 0.70799  | 15         |
| 37 | Paramillos               | Frontal Cordillera      | 487318.00 | 6406108.00 | Rodentia             | 0.707288 | This paper |
| 38 | Paramillos               | Frontal Cordillera      | 487318.00 | 6406108.00 | Rodentia             | 0.707579 | This paper |
| 39 | Alero Tunduqueral        | Uspallata Valley        | 470518.88 | 6400737.69 | Rodentia             | 0.70864  | 14         |
| 40 | Alero Tunduqueral        | Uspallata Valley        | 470518.93 | 6400737.73 | <i>Ctenomys</i> sp.  | 0.70849  | 15         |
| 41 | Barrio Ramos             | Uspallata Valley        | 467707.03 | 6393968.17 | Rodentia             | 0.709194 | This paper |
| 42 | San Ignacio              | Precordillera           | 483332.59 | 6353564.45 | <i>Galea</i> sp.     | 0.70910  | 15         |
| 43 | San Ignacio              | Precordillera           | 483321.59 | 6353588.29 | Rodentia             | 0.708230 | This paper |
| 44 | San Ignacio              | Precordillera           | 483321.59 | 6353588.29 | Rodentia             | 0.710457 | This paper |
| 45 | Los Conitos              | Precordillera           | 485344.52 | 6352958.45 | Rodentia             | 0.710907 | This paper |
| 46 | Los Conitos              | Precordillera           | 485344.52 | 6352958.45 | Rodentia             | 0.709528 | This paper |
| 47 | Los Conitos 1            | Precordillera           | 485354.51 | 6353031.54 | <i>Galea</i> sp.     | 0.71026  | 15         |
| 48 | Los Conitos 2            | Precordillera           | 485354.51 | 6353031.54 | <i>Phyllotis</i> sp. | 0.70950  | 15         |
| 49 | Agua de la Cueva         | Precordillera           | 484649.90 | 6391164.90 | <i>Phyllotis</i> sp. | 0.71008  | 15         |
| 50 | Agua de la Cueva         | Precordillera           | 484649.90 | 6391164.90 | <i>Ctenomys</i> sp.  | 0.71016  | 15         |
| 51 | Agua de la Cueva         | Precordillera           | 484649.90 | 6391164.90 | Rodentia             | 0.710480 | This paper |
| 52 | Agua de la Cueva         | Precordillera           | 484649.90 | 6391164.90 | Rodentia             | 0.710039 | This paper |
| 53 | COINCE. San Carlos       | Active foreland         | 501331.75 | 6274302.05 | Rodentia             | 0.70732  | 14         |
| 54 | Barrancas B61            | Active foreland         | 523664.26 | 6338346.19 | Rodentia             | 0.70666  | 14         |
| 55 | Barrancas B61            | Active foreland         | 523607.41 | 6338114.26 | <i>Galea</i> sp.     | 0.70692  | 15         |
| 56 | Barrancas B61            | Active foreland         | 523607.41 | 6338114.26 | <i>Galea</i> sp.     | 0.70681  | 15         |
| 57 | Natania                  | Active foreland         | 514004.77 | 6357671.52 | <i>Galea</i> sp.     | 0.70704  | 15         |
| 58 | Divisadero               | Active foreland         | 507761.63 | 6362308.71 | <i>Ctenomys</i> sp.  | 0.70747  | 15         |
| 59 | Natania                  | Active foreland         | 514006.13 | 6357668.54 | Rodentia             | 0.706979 | This paper |
| 60 | Natania                  | Active foreland         | 514006.13 | 6357668.54 | Rodentia             | 0.706986 | This paper |
| 61 | Lavalle                  | Active foreland         | 637003.00 | 6425141.00 | Rodentia             | 0.707564 | This paper |
| 62 | Lavalle                  | Active foreland         | 637003.00 | 6425141.00 | Rodentia             | 0.707494 | This paper |
| 63 | Capiz Alto               | Active foreland         | 502006.97 | 6274554.37 | Rodentia             | 0.707015 | This paper |
| 64 | Capiz Alto               | Active foreland         | 502006.97 | 6274554.37 | Rodentia             | 0.707507 | This paper |
| 65 | Barrancas B6             | Active foreland         | 523601.20 | 6338119.59 | Rodentia             | 0.706543 | This paper |

**Table S2.** Results for radiocarbon dates, radiogenic, and stable isotopes for human remains from the Uspallata Valley.

| Site                    | Individual | <sup>14</sup> C age (BP) | Laboratory code                         | Sex | Age (ys)    | Tissue                              | <sup>87</sup> Sr/ <sup>86</sup> Sr | Code      | C:N | δ <sup>13</sup> C <sub>collagen</sub> | δ <sup>15</sup> N | δ <sup>13</sup> C <sub>apat.</sub> |
|-------------------------|------------|--------------------------|-----------------------------------------|-----|-------------|-------------------------------------|------------------------------------|-----------|-----|---------------------------------------|-------------------|------------------------------------|
| Barrio Ramos I (+)      | 1          | 583±43 (*)               | AA-98708                                | M?  | 35-40       | rib                                 | 0.709582                           | MSR-296   | 3.2 | -15.9                                 | 10.1              | -9.4                               |
| Barrio Ramos I (+)      | 1          | 583±43 (*)               | AA-98708                                | M?  | 35-40       | I                                   | 0.709333                           | -         | -   | -                                     | -                 | -                                  |
| Barrio Ramos I (#)      | 2          | 583±43                   | AA-98708                                | M   | 40-50       | LC                                  | 0.70901                            | UCT-24149 | 3.3 | -15.1                                 | 9.0               | -4.4                               |
| Barrio Ramos I (#)      | 2          | 583±43                   | AA-98708                                | M   | 40-50       | rib                                 | 0.70953                            | UCT-24150 | 3.1 | -14.5                                 | 8.7               | -11.0                              |
| Barrio Ramos I (+, #)   | 3          | 583±43                   | AA-98708                                | F   | >40         | I2                                  | 0.70865                            | UCT-24151 | 3.1 | -11.6                                 | 9.0               | -10.0                              |
| Barrio Ramos I (+, #)   | 3          | 583±43                   | AA-98708                                | F   | >40         | rib                                 | 0.70922                            | UCT-24152 | 3.1 | -15.1                                 | 8.7               | -10.1                              |
| Monte de Algarrobos (+) | 1219       | 298±28 (*)               | D-AMS 030192 (δ <sup>13</sup> C = -15)  | F   | adult       | rib                                 | 0.70757                            | UCT-24163 | 3.1 | -13.6                                 | 7.7               | -9.6                               |
| Monte de Algarrobos (+) | 1219       | 298±28 (*)               | D-AMS 030192                            | F   | adult       | I <sup>2</sup> right                | 0.709128                           | UCT-24164 | 3.4 | -16.8                                 | 10.1              | -3.9                               |
| Usina Sur 2             | 1          | 772±25 (*)               | D-AMS 033193 (δ <sup>13</sup> C = -6.2) | ND  | adult       | rib                                 | 0.707462                           | UCT-24161 | 3.3 | -13.7                                 | 9.5               | -7.9                               |
| Usina Sur 2             | 2          | 772±25                   |                                         | ND  | adult       | molar                               | 0.707504                           | UCT-24162 | 3.0 | -15.1                                 | 10.4              | -10.4                              |
| Túmulo I                | n/n 1      | 977±35                   | AA-66568                                | ND  | adult       | 1st metatarsal                      | 0.709443                           | UCT-24165 | 3.2 | -16.9                                 | 9.2               | -11.4                              |
| Túmulo I                | n/n 2      | 977±35                   | AA-66568                                | ND  | young adult | 1st metatarsal                      | 0.709378                           | UCT-24166 | 3.2 | -16.8                                 | 8.8               | -11.6                              |
| Túmulo I                | n/n 3      | 977±35                   | AA-66568                                | ND  | adult       | 1st metatarsal                      | 0.709528                           | UCT-24167 | 3.1 | -16.7                                 | 9.8               | -9.6                               |
| Túmulo I                | n/n 4      | 977±35                   | AA-66568                                | ND  | adult       | 1st metatarsal                      | 0.709156                           | UCT-24168 | 3.2 | -17.2                                 | 10.4              | -12.3                              |
| Túmulo II               | 236        |                          |                                         | ND  | Sub-adult   | rib                                 | -                                  | UCT-24171 | 3.0 | -11.3                                 | 14.0              | -7.6                               |
| Túmulo II               | 237        |                          |                                         | N/D | 2.5-4       | rib                                 | 0.708931                           | UCT-24172 | 3.1 | -13.6                                 | 5.2               | -                                  |
| Túmulo II (+)           | 238        |                          |                                         | F?  | 8-9         | I dentine-enamel                    | 0.709073                           | UCT-24169 | 3.2 | -13.1                                 | 10.1              | -4.4                               |
| Túmulo II (+)           | 239        | 1269±35 (*)              | AA-66561                                | F   | >50         | rib                                 | 0.709188                           | USF-8304  | 3.2 | -11.9                                 | 8.7               | -7.5                               |
| Túmulo II (+)           | 239        | 1269±35 (*)              | AA-66561                                | F   | >50         | I <sub>2</sub> /M2                  | 0.708635                           | -         | -   | -                                     | -                 | -                                  |
| Túmulo II               | 240        |                          |                                         | M   | 40-49       | rib                                 | 0.709019                           | MSR-2     | 3.2 | -11.9                                 | 9.1               | -7.4                               |
| Túmulo II               | 240        |                          |                                         | M   | 40-49       | I <sub>2</sub> right                | 0.708342                           | -         | -   | -                                     | -                 | -                                  |
| Túmulo II               | 241        |                          |                                         | ND  | 35-45       | rib                                 | 0.709164                           | MSR-3     | 3.2 | -11.8                                 | 9.9               | -7.0                               |
| Túmulo II (+)           | 242        |                          |                                         | M   | 18-23       | rib                                 | 0.709002                           | MSR-6     | 3.2 | -10.5                                 | 9.7               | -5.0                               |
| Túmulo II (+)           | 242        |                          |                                         | M   | 18-23       | I <sup>2</sup> right dentine-enamel | 0.708639                           | UCT-24173 | 3.9 | -15.5                                 | 10.2              | -5.5                               |
| Túmulo II               | 243        | 1178±41 (*)              | AA-66565                                | F   | 40-49       | calcaneous                          | 0.709098                           | USF-8293  | -   | -12.1                                 | 10.1              | -6.5                               |
| Túmulo II               | 243        | 1178±41 (*)              | AA-66565                                | F   | 40-49       | I dentine/M3                        | 0.708497                           | UCT-24170 | 3.1 | -13.3                                 | 10.4              | -                                  |

|                      |       |            |                                         |    |           |                      |          |           |     |              |            |            |
|----------------------|-------|------------|-----------------------------------------|----|-----------|----------------------|----------|-----------|-----|--------------|------------|------------|
| Túmulo II            | 244   |            |                                         | F  | 39-45     | molar                | 0.709026 | -         | -   | -            | -          | -          |
| Túmulo II            | 245   |            |                                         | M  | 35-45     | rib                  | 0.709038 | USF-8292  | -   | <b>-12.4</b> | <b>9.8</b> | <b>6.6</b> |
| Túmulo II            | 245   |            |                                         | M  | 35-45     | I <sub>2</sub> right | 0.709035 | -         | -   | -            | -          | -          |
| Túmulo III           | n/n 1 | 671±40     | AA-66566                                | ND | adult     | 1st metatarsal       | 0.708955 | UCT-24174 | 3.2 | -11.3        | 9.6        | -6.3       |
| Túmulo III           | n/n 2 | 671±40     | AA-66566                                | ND | adult     | 1st metatarsal       | 0.70879  | UCT-24175 | 3.1 | -12.7        | 9.6        | -6.9       |
| Túmulo III           | n/n 3 | 671±40     | AA-66566                                | ND | adult     | 1st metatarsal       | 0.707267 | UCT-24176 | 3.1 | -12.9        | 8.3        | -6.4       |
| Potrero Las Colonias | n/n 1 | 568±38     | AA-66564                                | ND | sub-adult | 1st metatarsal       | 0.707251 | UCT-24153 | 3.2 | -9           | 8.9        | -4.0       |
| Potrero Las Colonias | n/n 2 | 634±28 (*) | D-AMS 031415 (δ <sup>13</sup> C = -6.6) | ND | adult     | 1st metatarsal       | 0.70732  | UCT-24154 | 3.3 | -12.3        | 9.2        | -4.9       |
| Potrero Las Colonias | n/n 3 | 682±25     | D-AMS 031415                            | ND | adult     | 1st metatarsal       | 0.707343 | UCT-24155 | 3.0 | -12          | 9.5        | -4.7       |
| Potrero Las Colonias | n/n 4 | 682±25     | D-AMS 031415                            | ND | adult     | 1st metatarsal       | 0.707252 | UCT-24156 | 3.1 | -11.2        | 9.8        | -4.5       |
| Potrero Las Colonias | n/n 5 | 682±25     | D-AMS 031415                            | ND | adult     | 1st metatarsal       | 0.707407 | UCT-24158 | 3   | -12.3        | 9.5        | -5.5       |
| Potrero Las Colonias | n/n 6 | 682±25     | D-AMS 031415                            | ND | adult     | 1st metatarsal       | 0.707243 | UCT-24159 | 3.3 | -11          | 9.6        | -4.4       |
| Potrero Las Colonias | n/n 7 | 682±25     | D-AMS 031415                            | ND | adult     | 1st metatarsal       | 0.707401 | UCT-24160 | 3.3 | -13          | 9.7        | -6.4       |

References: (\*) direct date for the individual; (+) individuals included in the morphometric analyses; (#) results originally published in<sup>14</sup>; values in bold from<sup>16</sup>.

**Table S3.** PC1 and PC2 loadings for whole skull (the most extreme values are shaded).

| Landmark | Coordinate | PC1        | PC2        |
|----------|------------|------------|------------|
| 1        | x          | -0.035664  | -0.049145  |
|          | y          | 0.0014104  | 0.055027   |
|          | z          | 0.066806   | 0.039034   |
| 2        | x          | -0.053533  | -0.024589  |
|          | y          | -0.012895  | 0.030803   |
|          | z          | 0.06038    | 0.010259   |
| 3        | x          | 0.080397   | 0.040884   |
|          | y          | 0.11613    | 0.065164   |
|          | z          | 0.077376   | -0.025755  |
| 4        | x          | 0.044639   | -0.041288  |
|          | y          | 0.079022   | 0.090812   |
|          | z          | 0.053155   | -0.02333   |
| 5        | x          | 0.0038474  | -0.14992   |
|          | y          | -0.027297  | -0.047223  |
|          | z          | 0.015634   | 0.078435   |
| 6        | x          | -0.0047364 | 0.025474   |
|          | y          | 0.015167   | -0.085404  |
|          | z          | -0.12526   | 0.1439     |
| 7        | x          | 0.048657   | 0.025555   |
|          | y          | -0.013058  | -0.065448  |
|          | z          | 0.0071797  | 0.064986   |
| 8        | x          | 0.057789   | -0.015569  |
|          | y          | -0.015394  | 0.0038715  |
|          | z          | 0.0096364  | -0.026452  |
| 9        | x          | 0.040668   | -0.058609  |
|          | y          | -0.0077466 | 0.055199   |
|          | z          | 0.020025   | -0.017962  |
| 10       | x          | 0.1103     | -0.078244  |
|          | y          | 0.015228   | 0.0043555  |
|          | z          | -0.069613  | 0.051146   |
| 11       | x          | 0.041363   | -0.057772  |
|          | y          | 0.028889   | 0.025535   |
|          | z          | -0.015018  | 0.042873   |
| 12       | x          | 0.084648   | -0.022087  |
|          | y          | -0.10011   | -0.013661  |
|          | z          | 0.10799    | 0.085194   |
| 13       | x          | 0.072847   | 0.026141   |
|          | y          | 0.14874    | 0.023368   |
|          | z          | 0.087229   | -0.054704  |
| 14       | x          | 0.079897   | -0.087291  |
|          | y          | 0.11756    | -0.039621  |
|          | z          | 0.065943   | 0.014818   |
| 15       | x          | 0.14845    | 0.12624    |
|          | y          | -0.073007  | 0.078459   |
|          | z          | 0.047412   | -0.0056561 |
|          | x          | -0.02341   | 0.0085464  |

|    |   |            |            |
|----|---|------------|------------|
| 16 | y | 0.07784    | 0.023487   |
|    | z | 0.061937   | -0.019453  |
| 17 | x | -0.079457  | 0.064081   |
|    | y | 0.015855   | 0.01649    |
|    | z | 0.071026   | -0.049339  |
| 18 | x | 0.035222   | 0.0052857  |
|    | y | 0.010702   | -0.023308  |
|    | z | -0.025484  | -0.035342  |
| 19 | x | 0.0087178  | -0.0087723 |
|    | y | -0.016417  | 0.027875   |
|    | z | 0.007952   | -0.025906  |
| 20 | x | 0.043595   | 0.015824   |
|    | y | -0.0094498 | 0.045366   |
|    | z | -0.030195  | -0.045008  |
| 21 | x | 0.00334    | -0.0078751 |
|    | y | 0.02745    | 0.064117   |
|    | z | -0.020476  | -0.029634  |
| 22 | x | 0.00073305 | -0.0029383 |
|    | y | 0.069683   | 0.057217   |
|    | z | -0.040431  | -0.016883  |
| 23 | x | 0.0084085  | 0.022319   |
|    | y | 0.11823    | 0.082831   |
|    | z | -0.051987  | -0.029904  |
| 24 | x | -0.034882  | 0.070222   |
|    | y | 0.13451    | 0.039725   |
|    | z | -0.064977  | 0.030603   |
| 25 | x | -0.026174  | 0.038363   |
|    | y | 0.11017    | 0.055108   |
|    | z | -0.076153  | -0.021606  |
| 26 | x | 0.021581   | 0.024514   |
|    | y | -0.0027559 | 0.00082094 |
|    | z | 0.0092535  | 0.046524   |
| 27 | x | 0.017947   | -0.027669  |
|    | y | -0.023961  | 0.0030416  |
|    | z | 0.05218    | 0.032018   |
| 28 | x | -0.029843  | -0.0049696 |
|    | y | 0.0014594  | -0.027052  |
|    | z | 0.019112   | 0.050171   |
| 29 | x | -0.086865  | 0.065254   |
|    | y | 0.019545   | -0.014557  |
|    | z | -0.010038  | -0.014926  |
| 30 | x | -0.076038  | 0.082586   |
|    | y | 0.041258   | 0.028113   |
|    | z | -0.042449  | 0.0061943  |
| 31 | x | 0.047036   | -0.022655  |
|    | y | -0.073708  | -0.025951  |
|    | z | 0.0096186  | 0.01442    |
|    | x | 0.093878   | -0.017874  |

|    |   |                 |                 |
|----|---|-----------------|-----------------|
| 32 | y | -0.13324        | -0.030055       |
|    | z | -0.024939       | -0.002912       |
| 33 | x | -0.0042941      | 0.12519         |
|    | y | -0.051763       | -0.005315       |
|    | z | 0.04574         | -0.1224         |
| 34 | x | -0.034731       | 0.19669         |
|    | y | -0.1292         | 0.054885        |
|    | z | 0.0094562       | -0.064187       |
| 35 | x | 0.15453         | <b>0.31543</b>  |
|    | y | -0.14283        | 0.12175         |
|    | z | -0.074071       | 0.009805        |
| 36 | x | 0.14588         | 0.034926        |
|    | y | -0.14581        | 0.086035        |
|    | z | -0.017646       | 0.046188        |
| 37 | x | 0.076183        | 0.079404        |
|    | y | -0.024949       | 0.038402        |
|    | z | -0.064337       | 0.11635         |
| 38 | x | 0.043668        | -0.092774       |
|    | y | -0.042661       | -0.10511        |
|    | z | 0.035058        | 0.033474        |
| 39 | x | 0.085296        | -0.056556       |
|    | y | 0.12128         | -0.16684        |
|    | z | 0.052291        | -0.042391       |
| 40 | x | -0.044994       | 0.029677        |
|    | y | 0.17699         | <b>-0.27245</b> |
|    | z | 0.10798         | -0.15026        |
| 41 | x | -0.092614       | 0.061987        |
|    | y | -0.073648       | -0.05838        |
|    | z | 0.025412        | 0.00050418      |
| 42 | x | -0.17795        | 0.038296        |
|    | y | -0.1189         | -0.027309       |
|    | z | 0.08184         | -0.0042689      |
| 43 | x | <b>-0.31209</b> | -0.14231        |
|    | y | -0.16521        | 0.066165        |
|    | z | 0.068454        | 0.11671         |
| 44 | x | <b>-0.22504</b> | -0.12479        |
|    | y | -0.16206        | 0.031334        |
|    | z | -0.10363        | -0.016102       |
| 46 | x | 0.082664        | -0.043039       |
|    | y | -0.10605        | -0.03606        |
|    | z | -0.095968       | -0.029314       |
| 47 | x | 0.01969         | -0.022039       |
|    | y | -0.07001        | -0.078873       |
|    | z | -0.063798       | -0.018524       |
| 48 | x | -0.063683       | 0.020469        |
|    | y | 0.0063923       | -0.01825        |
|    | z | -0.0041429      | 0.021154        |
|    | x | -0.060862       | 0.0047895       |



|    |   |               |                 |
|----|---|---------------|-----------------|
| 49 | y | 0.013365      | -0.045277       |
|    | z | 0.011134      | -0.031317       |
| 50 | x | 0.0058561     | -0.10718        |
|    | y | -0.044644     | 0.010765        |
|    | z | -0.026043     | 0.0029138       |
| 51 | x | -0.057236     | -0.11461        |
|    | y | 0.10623       | <b>-0.35034</b> |
|    | z | 0.014187      | 0.0060769       |
| 52 | x | -0.11695      | 0.040807        |
|    | y | 0.045987      | 0.071428        |
|    | z | -0.11811      | -0.34436        |
| 53 | x | -0.1031       | -0.076264       |
|    | y | 0.056252      | 0.0033049       |
|    | z | -0.10961      | 0.023438        |
| 54 | x | -0.037575     | -0.039255       |
|    | y | 0.013325      | 0.053338        |
|    | z | -0.039297     | 0.10445         |
| 55 | x | -0.060794     | -0.018541       |
|    | y | 0.079799      | 0.083166        |
|    | z | 0.03037       | 0.093259        |
| 56 | x | <b>0.1348</b> | -0.074323       |
|    | y | 0.018302      | 0.039126        |
|    | z | -0.018102     | -0.017011       |

**Table S4.** PC1 and PC2 loadings for the cranial base (the most extreme values are shaded).

| Landmark | coordinate | PC1              | PC2              |
|----------|------------|------------------|------------------|
| 45       | x          | <b>-0.396127</b> | <b>-0.378713</b> |
|          | y          | -0.183069        | <b>0.243076</b>  |
|          | z          | 0.126871         | <b>0.337828</b>  |
| 46       | x          | -0.090137        | 0.156308         |
|          | y          | -0.272092        | 0.094864         |
|          | z          | 0.123102         | -0.185095        |
| 47       | x          | 0.056115         | 0.007001         |
|          | y          | <b>0.232219</b>  | 0.003677         |
|          | z          | 0.045426         | 0.146927         |
| 48       | x          | -0.100196        | -0.032812        |
|          | y          | 0.160067         | -0.084511        |
|          | z          | 0.011179         | <b>0.209794</b>  |
| 49       | x          | 0.012947         | -0.017182        |
|          | y          | 0.090837         | -0.025645        |
|          | z          | 0.051792         | <b>0.240764</b>  |
| 50       | x          | -0.166694        | 0.090051         |
|          | y          | -0.128647        | 0.030677         |
|          | z          | -0.042979        | -0.073866        |
| 51       | x          | 0.081999         | -0.035399        |
|          | y          | 0.099830         | 0.194601         |
|          | z          | 0.037137         | -0.297216        |
| 52       | x          | 0.151755         | -0.069026        |
|          | y          | 0.035220         | 0.011543         |
|          | z          | 0.191504         | <b>-0.299680</b> |
| 53       | x          | 0.153716         | 0.064702         |
|          | y          | -0.068218        | 0.180402         |
|          | z          | 0.173189         | -0.072590        |
| 54       | x          | <b>0.200031</b>  | 0.091256         |
|          | y          | -0.005105        | -0.050963        |
|          | z          | -0.171655        | -0.060027        |
| 55       | x          | -0.045952        | 0.044622         |
|          | y          | -0.013570        | <b>-0.292846</b> |
|          | z          | <b>-0.558232</b> | 0.051915         |
| 56       | x          | 0.142543         | 0.079193         |
|          | y          | 0.052529         | <b>-0.304875</b> |
|          | z          | 0.012668         | 0.001245         |

**Table S5.** PC1 and PC2 loadings for the cranial vault (the most extreme values are shaded).

| Landmark | Coordinate | PC1              | PC2              |
|----------|------------|------------------|------------------|
| 31       | x          | 0.129344         | -0.040475        |
|          | y          | -0.141023        | -0.151392        |
|          | z          | 0.041775         | -0.100871        |
| 32       | x          | 0.090201         | -0.036744        |
|          | y          | <b>-0.273958</b> | <b>-0.285972</b> |
|          | z          | -0.012038        | -0.054958        |
| 33       | x          | 0.064458         | -0.126720        |
|          | y          | -0.162149        | -0.072239        |
|          | z          | -0.021321        | 0.110704         |
| 34       | x          | 0.016754         | -0.164596        |
|          | y          | -0.111391        | 0.065667         |
|          | z          | -0.022227        | 0.082295         |
| 35       | x          | 0.075188         | -0.145811        |
|          | y          | 0.082889         | 0.100642         |
|          | z          | -0.021818        | 0.078396         |
| 36       | x          | 0.206200         | -0.121747        |
|          | y          | 0.111976         | 0.039295         |
|          | z          | -0.009202        | -0.019918        |
| 37       | x          | 0.238788         | 0.225919         |
|          | y          | 0.093356         | -0.070477        |
|          | z          | 0.040532         | -0.102863        |
| 38       | x          | 0.021302         | <b>0.367995</b>  |
|          | y          | 0.124940         | -0.051311        |
|          | z          | 0.042522         | -0.021403        |
| 39       | x          | 0.039077         | <b>0.450128</b>  |
|          | y          | 0.265275         | -0.172759        |
|          | z          | 0.019558         | -0.002761        |
| 40       | x          | -0.055535        | 0.234011         |
|          | y          | <b>0.383569</b>  | -0.192769        |
|          | z          | -0.000307        | -0.015520        |
| 41       | x          | -0.045103        | -0.065370        |
|          | y          | <b>0.283436</b>  | 0.018503         |
|          | z          | -0.043623        | -0.001676        |
| 42       | x          | -0.044132        | -0.070525        |
|          | y          | 0.151830         | 0.148426         |
|          | z          | -0.065218        | 0.024768         |
|          | x          | -0.193416        | -0.136538        |

|    |   |                  |           |
|----|---|------------------|-----------|
| 43 | y | -0.086601        | 0.259291  |
|    | z | 0.008935         | -0.034122 |
|    | x | -0.254314        | -0.081518 |
| 44 | y | -0.293144        | 0.136926  |
|    | z | 0.020190         | 0.067595  |
|    | x | -0.192802        | -0.174594 |
| 45 | y | <b>-0.285661</b> | 0.072391  |
|    | z | 0.014033         | 0.020100  |
|    | x | -0.096010        | -0.113414 |
| 46 | y | -0.143343        | 0.155778  |
|    | z | 0.008209         | -0.029768 |

**Table S6.** Paleodietary results for bone samples from the Uspallata Valley (including individuals without  $^{87}\text{Sr}/^{86}\text{Sr}$  determinations).

| Sample | Site            | Individual   | Element          | Sex   | Age         | Lab Code     | % coll. | %N    | %C   | C/N | $\delta^{15}\text{N}$ | $\delta^{13}\text{C}_{\text{coll.}}$ | $\delta^{13}\text{C}_{\text{apat.}}$ | Source        |
|--------|-----------------|--------------|------------------|-------|-------------|--------------|---------|-------|------|-----|-----------------------|--------------------------------------|--------------------------------------|---------------|
| 1      | Barrio Ramos I  | 1            | bone fragment    | ND    | 35-40       | MSR296       | ND      | 15.2  | 41.2 | 3.2 | 10.1                  | -15.9                                | -9.4                                 | <sup>16</sup> |
| 2      | Barrio Ramos I  | 2            | rib              | M     | 40-50       | 24150        | 26      | 13.9  | 37.0 | 3.1 | 8.7                   | -14.5                                | -11.0                                | this paper    |
| 3      | Barrio Ramos I  | 3            | rib              | F     | >40         | 24152        | 24      | 15.8  | 41.3 | 3.1 | 8.7                   | -15.1                                | -10.1                                | this paper    |
| 4      | M. Algarrobos   | MM-1219      | rib              | F     | adult       | 24163        | 25      | 15.7  | 41.4 | 3.1 | 7.7                   | -13.6                                | -9.6                                 | this paper    |
| 5      | P. Las Colonias | MMy-284      | Mandible         | F     | 30-45       | USF8296      | ND      | ND    | ND   | ND  | 10.0                  | -11.0                                | -4.2                                 | <sup>16</sup> |
| 6      | P. Las Colonias | MMy-293      | rib              | M?    | >35         | MSR210       | ND      | 15.6  | 42.9 | 3.2 | 9.6                   | -10.4                                | -4.2                                 | <sup>16</sup> |
| 7      | P. Las Colonias | Mmy-440      | fibula diaphysis | ND    | >35         | MSR213       | ND      | 15.4  | 42.5 | 3.2 | 9.5                   | -11.7                                | -4.0                                 | <sup>16</sup> |
| 8      | P. Las Colonias | s/n 1        | 1st metatarsal   | ND    | subadult    | 24153        | 18      | 15.2  | 41.3 | 3.2 | 8.9                   | -9.0                                 | -4.0                                 | this paper    |
| 9      | P. Las Colonias | s/n 2        | 1st metatarsal   | ND    | adult       | 24154        | 15      | 15.8  | 45.0 | 3.3 | 9.2                   | -12.3                                | -4.9                                 | this paper    |
| 10     | P. Las Colonias | s/n 3        | 1st metatarsal   | ND    | adult       | 24155        | 13      | 15.8  | 40.7 | 3.0 | 9.5                   | -12.0                                | -4.7                                 | this paper    |
| 11     | P. Las Colonias | s/n 4        | 1st metatarsal   | ND    | adult       | 24156        | 11      | 15.55 | 40.6 | 3.1 | 9.8                   | -11.2                                | -4.5                                 | this paper    |
| 12     | P. Las Colonias | s/n 5        | 1st metatarsal   | ND    | adult       | 24158        | 18      | 15.5  | 39.8 | 3.0 | 9.5                   | -12.3                                | -5.5                                 | this paper    |
| 13     | P. Las Colonias | s/n 6        | 1st metatarsal   | ND    | adult       | 24159        | 10      | 15.7  | 44.7 | 3.3 | 9.6                   | -11.0                                | -4.4                                 | this paper    |
| 14     | P. Las Colonias | s/n 7        | 1st metatarsal   | ND    | adult       | 24160        | 10      | 15.8  | 44.9 | 3.3 | 9.7                   | -13.0                                | -6.4                                 | this paper    |
| 15     | Túmulo I        | MMy-229      | parietal         | Indet | >50         | USF8294      | ND      | ND    | ND   | ND  | 9.7                   | -16.4                                | -11.0                                | <sup>16</sup> |
| 16     | Túmulo I        | MMy-203-204b | phalange         | ND    | >35         | MMy-203-204b | ND      | 13.5  | 37.3 | 3.2 | 10.1                  | -15.7                                | -11.8                                | <sup>16</sup> |
| 17     | Túmulo I        | MM-220       | rib              | ND    | >35         | MM-220       | ND      | 14.7  | 40.0 | 3.2 | 10.1                  | -13.3                                | -8.3                                 | <sup>16</sup> |
| 18     | Túmulo I        | MMy-203-204a | phalange         | ND    | >35         | MMy-203-204a | ND      | 15.1  | 41.5 | 3.2 | 10.0                  | -15.8                                | -11.7                                | <sup>16</sup> |
| 19     | Túmulo I        | s/n          | 1st metatarsal   | ND    | adult       | 24165        | 22      | 15.8  | 43.1 | 3.2 | 9.2                   | -16.9                                | -11.4                                | this paper    |
| 20     | Túmulo I        | s/n          | 1st metatarsal   | ND    | young adult | 24166        | 16      | 15.6  | 42.6 | 3.2 | 8.8                   | -16.8                                | -11.6                                | this paper    |
| 21     | Túmulo I        | s/n          | 1st metatarsal   | ND    | adult       | 24167        | 25      | 15.9  | 42.8 | 3.1 | 9.8                   | -16.7                                | -9.6                                 | this paper    |
| 22     | Túmulo I        | s/n          | 1st metatarsal   | ND    | adult       | 24168        | 22      | 15.9  | 43.8 | 3.2 | 10.4                  | -17.2                                | -12.3                                | this paper    |
| 23     | Túmulo II       | MM-236       | rib              | ND    | infant      | 24171        | 16      | 15.0  | 39.1 | 3.0 | 14.0                  | -11.3                                | -7.6                                 | this paper    |

|    |            |              |                |    |        |          |    |      |      |     |      |       |      |               |
|----|------------|--------------|----------------|----|--------|----------|----|------|------|-----|------|-------|------|---------------|
| 24 | Túmulo II  | MMy-239      | rib            | F  | >50    | MSR-4    | ND | 15.0 | 41.2 | 3.2 | 8.7  | -11.9 | -7.5 | <sup>16</sup> |
| 25 | Túmulo II  | MM-240       | rib            | M? | 40-49  | MSR-2    | ND | 14.8 | 40.5 | 3.2 | 9.1  | -11.9 | -7.4 | <sup>16</sup> |
| 26 | Túmulo II  | MM-241       | rib            | ND | 35-45  | MSR-3    | ND | 14.6 | 40.6 | 3.2 | 9.9  | -11.8 | -7.0 | <sup>16</sup> |
| 27 | Túmulo II  | MM-242       | rib            | M  | 18-23  | MSR-6    | ND | 14.7 | 40.6 | 3.2 | 9.7  | -10.5 | -5.0 | <sup>16</sup> |
| 28 | Túmulo II  | MMY-243      | calcaneus      | F  | 35-49  | USF-8293 | ND | ND   | ND   | ND  | 10.1 | -12.1 | -6.5 | <sup>16</sup> |
| 29 | Túmulo II  | MM-244       | rib            | F  | 35-49  | USF8294  | ND | ND   | ND   | ND  | 8.8  | -11.9 | -8.8 | <sup>16</sup> |
| 30 | Túmulo II  | MM-245       | rib            | M  | 35-45  | USF-8292 | ND | ND   | ND   | ND  | 9.8  | -12.4 | -6.6 | <sup>16</sup> |
| 31 | Túmulo III | MMy-1097     | bone fragment  | ND | >35    | USF 8297 | ND | ND   | ND   | ND  | 7.8  | -11.2 | -3.4 | <sup>16</sup> |
| 32 | Túmulo III | MM-1164      | rib            | ND | >35    | MSR 5    | ND | 13.9 | 37.8 | 3.2 | 10.2 | -11.4 | -6.5 | <sup>16</sup> |
| 33 | Túmulo III | MMy-1156-57a | 5th metatarsal | ND | >35    | MSR215   | ND | 12.9 | 35.6 | 3.2 | 9.4  | -11.8 | -4.3 | <sup>16</sup> |
| 34 | Túmulo III | MMy-1156-57b | 5th metatarsal | ND | infant | MSR216   | ND | 11.6 | 31.9 | 3.2 | 10.3 | -11.3 | -5.9 | <sup>16</sup> |
| 35 | Túmulo III | MMy-1156-57c | 5th metatarsal | ND | adult  | MSR217   | ND | 15.2 | 41.4 | 3.2 | 9.9  | -11.9 | -6.7 | <sup>16</sup> |
| 36 | Túmulo III | s/n          | 1st metatarsal | ND | adult  | 24174    | 17 | 15.7 | 42.4 | 3.1 | 9.6  | -11.3 | -6.3 | this paper    |
| 37 | Túmulo III | s/n          | 1st metatarsal | ND | adult  | 24175    | 19 | 15.5 | 41.6 | 3.1 | 9.6  | -12.7 | -6.9 | this paper    |
| 38 | Túmulo III | s/n          | 1st metatarsal | ND | adult  | 24176    | 21 | 15.7 | 41.0 | 3.0 | 8.3  | -12.9 | -6.4 | this paper    |
| 39 | Usina Sur  | 1            | rib            | ND | ND     | 24161    | 20 | 15.8 | 44.6 | 3.3 | 9.5  | -13.7 | -7.9 | this paper    |



**Table S7.** Descriptive statistics of the stable isotopic results for archaeological sites with migrants and locals.

|                    | Sites with migrants   |                                      |                                      | Sites with locals     |                                      |                                      |
|--------------------|-----------------------|--------------------------------------|--------------------------------------|-----------------------|--------------------------------------|--------------------------------------|
|                    | $\delta^{15}\text{N}$ | $\delta^{13}\text{C}_{\text{coll.}}$ | $\delta^{13}\text{C}_{\text{apat.}}$ | $\delta^{15}\text{N}$ | $\delta^{13}\text{C}_{\text{coll.}}$ | $\delta^{13}\text{C}_{\text{apat.}}$ |
| N                  | 20                    | 20                                   | 20                                   | 19                    | 19                                   | 19                                   |
| Mean               | 9.4                   | -11.8                                | -5.5                                 | 9.8                   | -14.1                                | -9.2                                 |
| Standard deviation | 0.7                   | 1.1                                  | 1.6                                  | 1.2                   | 2.3                                  | 2.2                                  |
| Minimum value      | 7.7                   | -13.7                                | -9.6                                 | 8.7                   | -17.2                                | -12.3                                |
| Maximum value      | 10.3                  | -9.0                                 | -3.4                                 | 14.0                  | -10.5                                | -5.0                                 |

**Table S8.** Area distribution of the stable isotopic values for migrants and locals.

|                                                     | Sites with migrants | Sites with locals |
|-----------------------------------------------------|---------------------|-------------------|
| Total area                                          | 10.293750           | 16.745750         |
| Standard Ellipse Area (SEA)                         | 3.677628            | 6.967541          |
| Standard Ellipse Area Corrected (SEA <sub>C</sub> ) | 3.881941            | 7.377397          |
| Standard Ellipse Area Bayesian (SEA <sub>B</sub> )  | 3.224               | 9.913             |

**Table S9.** List of Landmarks and semilandmarks (indicated in *italic*) registered for the present analysis.

| N  | Landmark name and abbreviation | Definition and Reference                                                                                                                                                                                   |
|----|--------------------------------|------------------------------------------------------------------------------------------------------------------------------------------------------------------------------------------------------------|
| 1  | Nasion (n)                     | Point of intersection between the frontonasal suture and the sagittal plane <sup>22</sup>                                                                                                                  |
| 2  | Nasofrontale (nf)              | Point of intersection between the frontonasal suture and the upper lateral margin of the nasal <sup>23</sup>                                                                                               |
| 3  | Subespinale (ss)               | Deepest inferior point in the nasal profile at the end of the nasal spine <sup>24</sup>                                                                                                                    |
| 4  | Alare (al)                     | Most lateral point in the nasal opening located at the transversal plane, measured at the margin of the nasal opening <sup>24</sup>                                                                        |
| 5  | Dacryon (d)                    | Point at the medial border of the orbit at where the frontal, lacrimal and maxillary bones intercept. Located at the intersection between the lacrimomaxillary suture and the frontal bone <sup>24</sup>   |
| 6  | Supraorbital Foramen (sf)      | Medial point of the supraorbital foramen <sup>25</sup>                                                                                                                                                     |
| 7  | Orbital Superior (os)          | Highest point on the edge of the left orbit, perpendicular to the major axis of the orbit and bisecting it <sup>24</sup>                                                                                   |
| 8  | Frontomolare Anterior (fma)    | Most anterior point in the fronto-malar suture (Frontomolare orbitale) <sup>22</sup>                                                                                                                       |
| 9  | Ectoconchion (ek)              | Opposite the dacryon, this point is in the intersection between the most anterior surface of the lateral edge of the orbit and a line that bisects it through its major axis (Ectoconkchion) <sup>22</sup> |
| 10 | <i>SL Orbital 1 (so1)</i>      | Semilandmark located at the distal lower border of the orbit <sup>24</sup>                                                                                                                                 |
| 11 | Zygoorbitale (zo)              | Intersection between the orbital margin and the zygomaxillary suture. Registered at the midpoint, on the edge of the orbit between the facial surface and the orbital <sup>24</sup>                        |
| 12 | <i>SL Orbital 2 (so2)</i>      | Semilandmark located at the lower medial end of the orbit <sup>24</sup>                                                                                                                                    |
| 13 | Prosthion (pr)                 | Most prominent anterior point on alveolar border at the sagittal line, above the septum between the central incisors (Prosthion) <sup>22</sup>                                                             |
| 14 | Canine (can)                   | Most prominent point at the alveolar border, between the canine and the first premolar <sup>23</sup>                                                                                                       |
| 15 | Ectomolare (em)                | Most lateral point on the external surface of the alveolar border, between M2 and M3 ("Endomolare") <sup>22</sup>                                                                                          |

|    |                                        |                                                                                                                                                                            |
|----|----------------------------------------|----------------------------------------------------------------------------------------------------------------------------------------------------------------------------|
| 16 | Palatine (p)                           | Point of intersection between the palatal suture and the sagittal plane <sup>25</sup>                                                                                      |
| 17 | Alveolon (alv)                         | Point on the hard palate where a line drawn at the most posterior points of the alveolar edges crosses the sagittal plane <sup>24</sup>                                    |
| 18 | Frontomalare Temporale (fmt)           | Most lateral point on the fronto-zygomatic suture. Located posteriorly on the ridge that connects to the orbits <sup>22</sup>                                              |
| 19 | <i>SL malar superior 1 (sms1)</i>      | Located at the superior lateral border of the zygomatic bone, below the landmark Frontomalare Temporale <sup>25</sup>                                                      |
| 20 | <i>SL malar superior 2 (sms2)</i>      | Located at the superior lateral border of the zygomatic bone, below sm1 <sup>25</sup>                                                                                      |
| 21 | <i>SL malar superior 3 (sms3)</i>      | Located at the superior lateral border of the zygomatic bone, below sm2 <sup>25</sup>                                                                                      |
| 22 | <i>SL malar superior 4 (sms4)</i>      | Located at the superior lateral border of the zygomatic bone, below sm3 <sup>25</sup>                                                                                      |
| 23 | Temporomalare Superior (tms)           | Point located at the external superior surface of the temporo-zygomatic suture <sup>25</sup>                                                                               |
| 24 | Temporomalare Inferior (tmi)           | Point located at the external lower surface of the temporo-zygomatic suture <sup>25</sup>                                                                                  |
| 25 | Temporomalare Inferior Internal (tmii) | Point located at the lower internal surface of the temporo-zygomatic suture <sup>25</sup>                                                                                  |
| 26 | Zygomaxillare Anterior (zma)           | Point located inferiorly at the intersection of the zygomaxillare suture and the attachment place of the masseter muscle on the external side <sup>25</sup>                |
| 27 | Zygomaxillare Posterior (zmp)          | Point located inferiorly at the intersection of the zygomaxillare suture and the attachment place of the masseter muscle on the internal side <sup>25</sup>                |
| 28 | <i>SL malar inferior 1 (smi1)</i>      | Semilandmark located on the lower edge of the malar bone, adjacent to the zma <sup>25</sup>                                                                                |
| 29 | <i>SL malar inferior 2 (smi2)</i>      | Semilandmark located on the lower edge of the malar bone, between zma and smi3 <sup>25</sup>                                                                               |
| 30 | <i>SL malar inferior 3 (smi3)</i>      | Semilandmark located on the lower edge of the malar bone, after smi2 <sup>25</sup>                                                                                         |
| 31 | Glabella (g)                           | Most anterior point of the frontal bone, located on the sagittal plane, between the supraorbital edges, usually above the frontonasal suture (Supraorbitale) <sup>22</sup> |
| 32 | Frontex (f)                            | Point above the glabella, located at the sagittal plane, over the middle line where the frontal bone becomes more concave (Ophryon) <sup>22</sup>                          |
| 33 | <i>SL frontal 1 (sf1)</i>              | Point located posteriorly to the frontex on the frontal bone <sup>25</sup>                                                                                                 |
| 34 | <i>SL frontal 2 (sf2)</i>              | Point located posteriorly to the sf1 on the frontal bone <sup>25</sup>                                                                                                     |
| 35 | <i>SL frontal 3 (sf3)</i>              | Point located between to the sf1 and bregma on the frontal bone <sup>25</sup>                                                                                              |
| 36 | Bregma (b)                             | Point located at the intersection between the Coronal and Sagittal sutures <sup>22</sup>                                                                                   |
| 37 | <i>SL parietal 1 (sp1)</i>             | Point located posteriorly to the bregma on the sagittal suture <sup>25</sup>                                                                                               |
| 38 | <i>SL parietal 2 (sp2)</i>             | Point located posteriorly to the sp1 on the sagittal suture <sup>25</sup>                                                                                                  |
| 39 | <i>SL parietal 3 (sp3)</i>             | Point located posteriorly to the sp2 on the sagittal suture <sup>25</sup>                                                                                                  |
| 40 | <i>SL parietal 4 (sp4)</i>             | Point located posteriorly to the sp3 on the sagittal suture <sup>25</sup>                                                                                                  |
| 41 | Lambda (l)                             | Point located at the intersection between the sagittal and the lambdoid sutures <sup>22</sup>                                                                              |
| 42 | <i>SL occipital 1 (soc1)</i>           | Point located posteriorly to the lambda on the occipital bone <sup>25</sup>                                                                                                |
| 43 | <i>SL occipital 2 (soc2)</i>           | Point located posteriorly the soc1 on the occipital bone <sup>25</sup>                                                                                                     |
| 44 | Opisthocranium (op)                    | When the skull is positioned on the Frankfurt plane, most posterior point protruding from the occipital bone on the sagittal plane <sup>22</sup>                           |
| 45 | Asterion (as)                          | Point located at the intersection of the temporal, parietal and occipital bones <sup>22,26</sup>                                                                           |
| 46 | Opisthion (o)                          | Point of intersection between the posterior edge of the foramen magnum intersects and the sagittal line (Opisthion) <sup>22</sup>                                          |
| 47 | Basion (ba)                            | Point located at the intersection of the anterior edge of the foramen magnum and the sagittal line <sup>22</sup>                                                           |
| 48 | Spheno-occipital (so)                  | Point located at the intersection between the sphenooccipital suture and the sagittal line (Sphenobasion) <sup>22</sup>                                                    |
| 49 | Spheno-occipital lateral (sol)         | Most lateral point located anteriorly in the spheno-occipital suture <sup>25</sup>                                                                                         |
| 50 | Temporo-occipital (to)                 | Most anterior point in the temporal suture located at the skull base <sup>25</sup>                                                                                         |
| 51 | Temporo-sphenoid (ts)                  | V-point of the spheno-temporal suture <sup>25</sup>                                                                                                                        |
| 52 | Temporomandibulare (TM)                | Point located at the posterolateral or distal border of the glenoid fossa <sup>25</sup>                                                                                    |
| 53 | Auriculare (au)                        | Highest point on the helix of the auricle, at the posterior ridge of the zygomatic bone at the central upper border of the auditory meatus ("Auriculare") <sup>22</sup>    |
| 54 | Anterior Mastoid (am)                  | Anteriorly located at the intersection between the lower edge of the auditory meatus and the mastoid bone <sup>25</sup>                                                    |
| 55 | Inferior Mastoid (im)                  | Lowest point of the mastoid bone (Mastoideale) <sup>22</sup>                                                                                                               |
| 56 | Posterior Mastoid (pm)                 | Most posterior point in the mastoid bone at the intersection with a projected line to the anterior mastoid <sup>25</sup>                                                   |

**Table S10.** List of studied specimens for 3D geometric morphometrics.

| Code | Site                 | <sup>87</sup> Sr/ <sup>86</sup> Sr signature | Sex determination | Age estimation | 95% cal range (AD) |
|------|----------------------|----------------------------------------------|-------------------|----------------|--------------------|
| 229  | Túmulo I             | Local                                        | Indetermined      | >50            | 1020–1190          |
| 230  | Túmulo I             | Local                                        | Masculine         | >50            | 1020–1190          |
| 237  | Túmulo II            | Local                                        | Indetermined      | 2.5-4          | 770–1000           |
| 240  | Túmulo II            | Local                                        | Masculine         | 40-49          | 770–1000           |
| 243  | Túmulo II            | Local                                        | Femenine          | 35-49          | 770–1000           |
| 245  | Túmulo II            | Local                                        | Masculine         | 35-45          | 770–1000           |
| 238  | Túmulo II            | Local                                        | Femenine          | 9-11           | 770–1000           |
| 239  | Túmulo II            | Local                                        | Femenine          | >50            | 680–890            |
| 242  | Túmulo II            | Local                                        | Masculine         | 18-23          | 770–1000           |
| 1    | Barrio Ramos I       | Local                                        | Masculine         | 35-40          | 1310–1450          |
| 2    | Barrio Ramos I       | Local                                        | Masculine         | 40-50          | 1310–1450          |
| 3    | Barrio Ramos I       | Local                                        | Femenine          | >40            | 1310–1450          |
| 1138 | Túmulo III           | Non-local                                    | Indetermined      | Adult          | 1270–1420          |
| 1219 | Monte de Algarrobos  | Non-local                                    | Femenine          | 35-45          | 1500–1800          |
| 297  | Potrero Las Colonias | Non-local                                    | Femenine          | Adult          | 1290–1430          |
| 298  | Potrero Las Colonias | Non-local                                    | Masculine         | 20-30          | 1290–1430          |
| 305  | Potrero Las Colonias | Non-local                                    | Masculine         | >45            | 1290–1430          |
| 807  | Potrero Las Colonias | Non-local                                    | Femenine          | 30-45          | 1290–1430          |
| 808  | Potrero Las Colonias | Non-local                                    | Femenine          | 10-12          | 1290–1430          |
| 810  | Potrero Las Colonias | Non-local                                    | Masculine         | Adult          | 1290–1430          |
| 1203 | Potrero Las Colonias | Non-local                                    | Masculine         | 30-35          | 1290–1430          |

### Supplementary references

- Harris, C. The oxygen isotope composition of Karoo and Etendeka picrites: high  $\delta^{18}\text{O}$  mantle or crustal contamination? *Contrib Miner. Pet.* **170**, 8 (2015).
- Pin, C. Concomitant Separation of strontium and samarium–neodymium for isotopic analysis in silicate samples, based on specific extraction chromatography. *Anal Chim Acta* **298**, 209–217 (1994).
- R Core Team. (2013).
- Cohen, J. *Statistical power analysis for the behavioral sciences*. (Erlbaum, 1988).
- Lee-Thorp, J. *et al.* Exploring problems and opportunities offered by down-scaling sample sizes for carbon isotope analyses of fossils. *Bull Soc Geol Fr* **168**, 767–773 (1997).
- Luyt, J., Hare, V. J. & Sealy, J. The relationship of ungulate  $\delta^{13}\text{C}$  and environment in the temperate biome of southern Africa, and its palaeoclimatic application. *Palaeogeogr. Palaeoclimatol. Palaeoecol.* **514**, 282–291 (2019).
- Ambrose, S. H. Preparation and characterization of bone and tooth collagen for isotopic analysis. *J. Archaeol. Sci.* **17**, 431–451 (1990).
- Bronk Ramsey, C. Bayesian Analysis of Radiocarbon Dates. *Radiocarbon* **51**, 337–360 (2009).
- Finucane, B. C. Maize and Sociopolitical Complexity in the Ayacucho Valley, Peru. *Curr. Anthropol.* **50**, 535–545 (2009).
- Falabella, F., Planella, M. T. & Tykot, R. H. El Maíz (*Zea mays*) en el Mundo Prehispánico de

Chile Central. *Lat. Am. Antiq.* **19**, 25–46 (2008).

11. Alfonso-Durruty, M., Troncoso, A., Larach, P., Becker, C. & Misarti, N. Maize (*Zea mays*) consumption in the southern andes (30°-31° S. Lat): Stable isotope evidence (2000 BCE-1540 CE). *Am. J. Phys. Anthropol.* **164**, 148–162 (2017).
12. Somerville, A. D. *et al.* Diet and gender in the Tiwanaku colonies: Stable isotope analysis of human bone collagen and apatite from Moquegua, Peru. *Am. J. Phys. Anthropol.* **158**, 408–422 (2015).
13. Killian Galván, V., Seldes, V. & Nielsen, A. E. Inferencia paleodietaria en el sitio arqueológico los amarillos (Quebrada de Humahuaca, Jujuy, Argentina). *Relac. Soc. Argent. Antropol.* **XLI**, 79–99 (2016).
14. Barberena, R. *et al.* Scale of human mobility in the southern Andes (Argentina and Chile): A new framework based on strontium isotopes. *Am. J. Phys. Anthropol.* **164**, 305–320 (2017).
15. Barberena, R. *et al.* Bioavailable Strontium in the Southern Andes (Argentina and Chile): A Tool for Tracking Human and Animal Movement. *Environ. Archaeol.* 1–13 (2019)  
doi:10.1080/14614103.2019.1689894.
16. Gil, A. F. *et al.* Isotopic evidence on human bone for declining maize consumption during the little ice age in central western Argentina. *J. Archaeol. Sci.* **49**, 213–227 (2014).
17. Martin, R. & Saller, K. *Lehrbuch der Anthropologie*. (Fisher, 1957).
18. Gonzalez, P. N., Perez, S. I. & Bernal, V. Ontogenetic allometry and cranial shape diversification among human populations from south America. *Anat. Rec.* **294**, (2011).
19. Howells, W. W. Cranial variation in man. A study by multivariate analysis of patterns of difference among recent human populations. *Pap. Peabody Mus. Archaeol.* **67**, 1–259 (1973).
20. Menéndez, L. P. *Diversificación Morfológica Craneofacial y Diversidad en la Dieta. El Caso de la Región Centro-Oeste de Argentina durante el Holoceno tardío*. vol. S2743 (Archaeopress, 2015).
21. Bookstein, F. L. Landmark methods for forms without landmarks: morphometrics of group differences in outline shape. *Med Image Anal* **1**, 225–243 (1997).
